# Supplementary material for: Studies on PBFMO-b-PNMMO alternative block thermoplastic elastomers as potential binders for solid propellants
Source: Royal Society of Chemistry journal article supplement (doi:10.1039/c9ra05517g), 2019-01-01
Supplement: c9ra05517g1.pdf [file c9ra05517g1.pdf]

## Supplementary Information

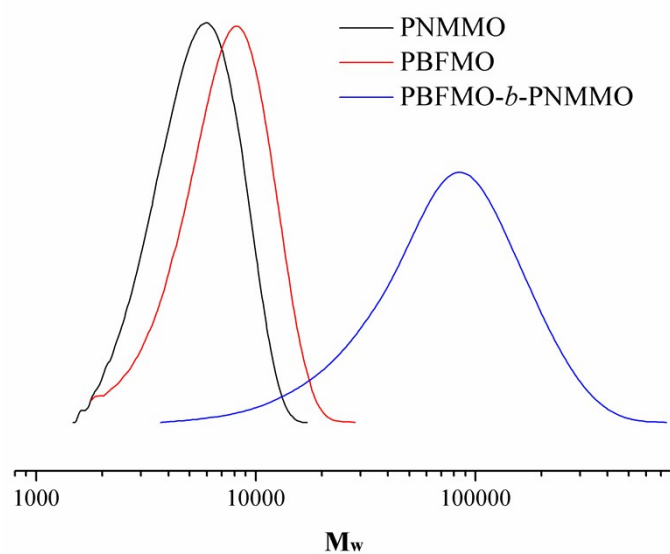

**Fig. S1.** GPC curves of PNMMO ( $M_n=4650 \text{ g mol}^{-1}$ , PDI=1.18), PBFMO ( $M_n= 6840 \text{ g mol}^{-1}$ , PDI=1.22) and PBFMO-*b*-PNMMO ( $M_n= 53135 \text{ g mol}^{-1}$ , PDI=1.82).
